# Supplementary material for: Eldfellite-type cathode material, NaV(SO4)2, for Na-ion batteries
Source: Royal Society of Chemistry journal article supplement (doi:10.1039/d2ma00031h), 2022-01-01
Supplement: d2ma00031h1.pdf [file d2ma00031h1.pdf]

*Supporting Information*

**Eldfellite-type Cathode Material,  $\text{NaV}(\text{SO}_4)_2$ , for Na-ion Batteries**

Akira Nishio,<sup>\*a</sup> Yuji Ishado,<sup>b</sup> Kosuke Nakamoto,<sup>b</sup> Eiichi Kobayashi,<sup>c</sup> Atsushi Inoishi,<sup>\*b</sup> Hikari Sakaebe<sup>b</sup> and Shigeto Okada<sup>b</sup>

- a. Interdisciplinary Graduate School of Engineering Sciences, Kyushu University, 6-1 Kasuga-koen, Kasuga, Fukuoka 816-8580, Japan.
- b. Institute for Materials Chemistry and Engineering, Kyushu University, 6-1 Kasuga-koen, Kasuga, Fukuoka 816-8580, Japan.
- c. Kyushu Synchrotron Light Research Center, 8-7 Yayoigaoka, Tosu, Saga 841-0005, Japan.

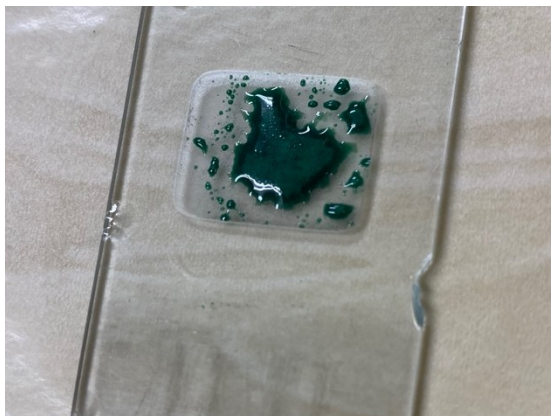

**Fig. S1**  $\text{NaV}(\text{SO}_4)_2$  which was left in the atmosphere overnight. It has become soaked because it has absorbed moisture from the atmosphere.

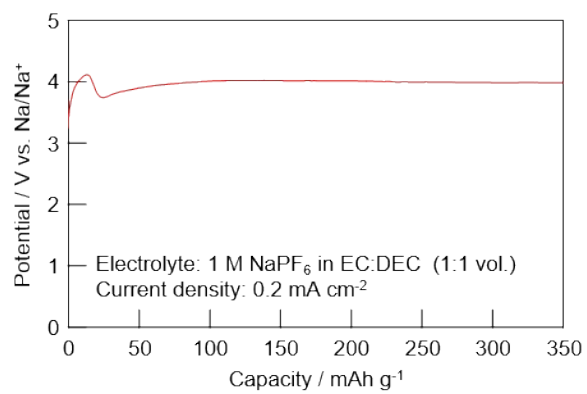

**Fig. S2** Charging curves for NaV(SO<sub>4</sub>)<sub>2</sub> after charging (desodiation) toward high potentials at the first cycle;

the electrolyte was 1 M NaPF<sub>6</sub> in EC:DEC (1:1 by volume).

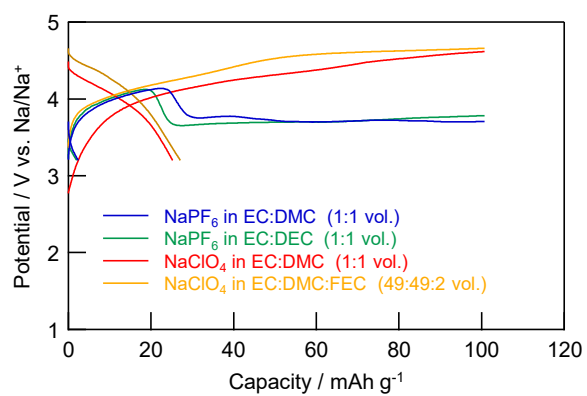

**Fig. S3** Charge–discharge curves of NaV(SO<sub>4</sub>)<sub>2</sub> for the first cycle in cells constructed using four different electrolytes. The charge capacity was regulated to 101 mAh g<sup>-1</sup>, and the cutoff voltage and current density were set as 3.2–4.8 V and 0.1 mA cm<sup>-2</sup>, respectively.

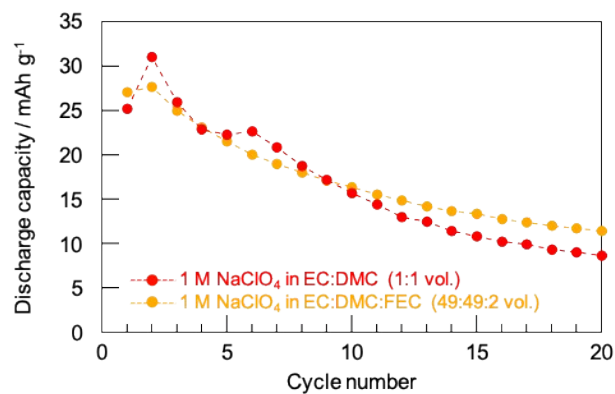

**Fig. S4** Cycle performance of  $\text{NaV}(\text{SO}_4)_2$  using 1 M  $\text{NaClO}_4$  in EC:DMC (1:1 by volume) and 1 M  $\text{NaClO}_4$  in EC:DMC:FEC (49:49:2 by volume) as the electrolyte. The charge capacity was regulated to  $101 \text{ mAh g}^{-1}$ , and the cutoff voltage and current density were set as 3.2–4.8 V and  $0.1 \text{ mA cm}^{-2}$ , respectively.

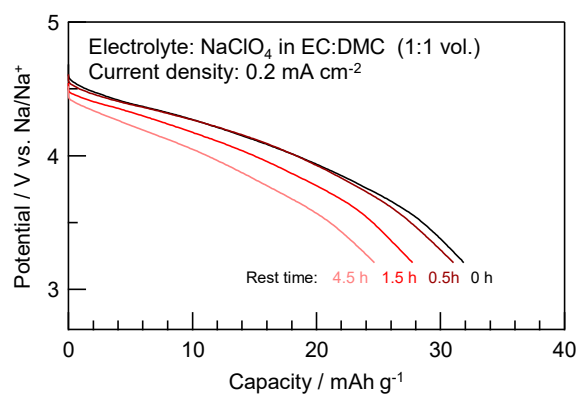

**Fig. S5** Discharge curves of NaV(SO<sub>4</sub>)<sub>2</sub> after charging (desodiation) for 101 mAh g<sup>-1</sup> toward high potentials at the first cycle of cells constructed using 1 M NaClO<sub>4</sub> in EC:DMC (1:1 by volume) as the electrolyte. The rest time was varied from 0 h to 4.5 h.

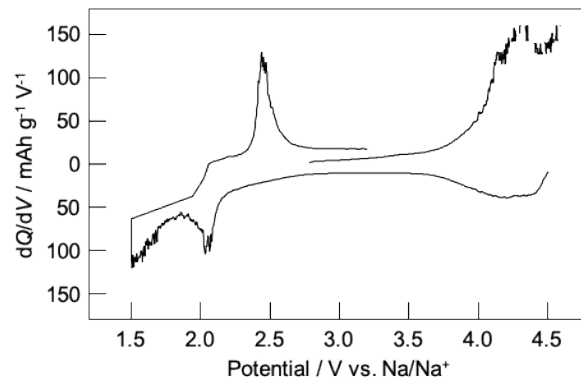

**Fig. S6**  $dQ/dV$  curves obtained from the initial charge-discharge measurement provided from Fig. 3e.

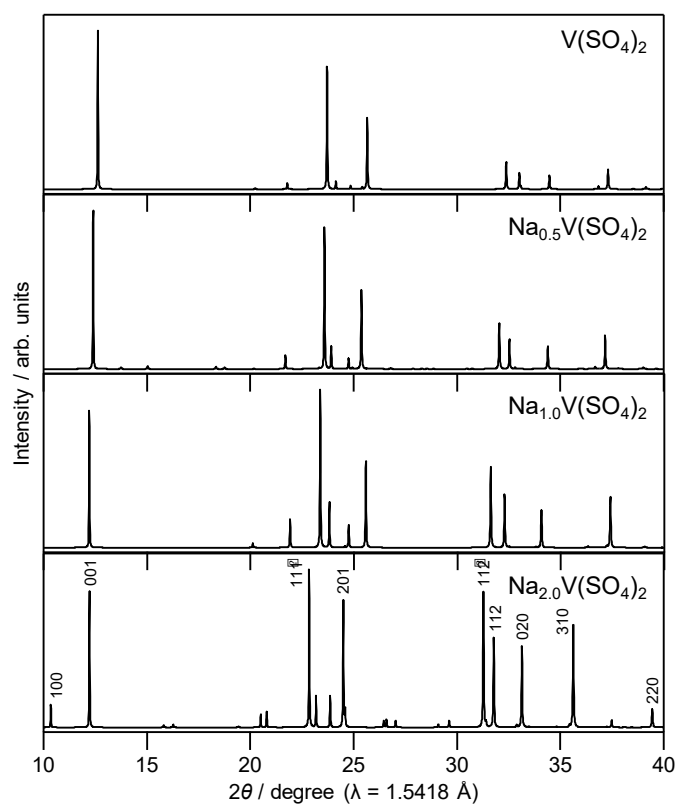

**Fig. S7** Calculated XRD patterns for each  $Na^+$  content ( $x$ ) in  $Na_xV(SO_4)_2$ . The stabilized crystal structures were obtained using DFT calculations, and the XRD patterns based on the DFT-calculated structure were exported using the VESTA software.<sup>1</sup>



Electrolyte: 1 M NaPF<sub>6</sub> in EC:DEC (1:1 vol.)

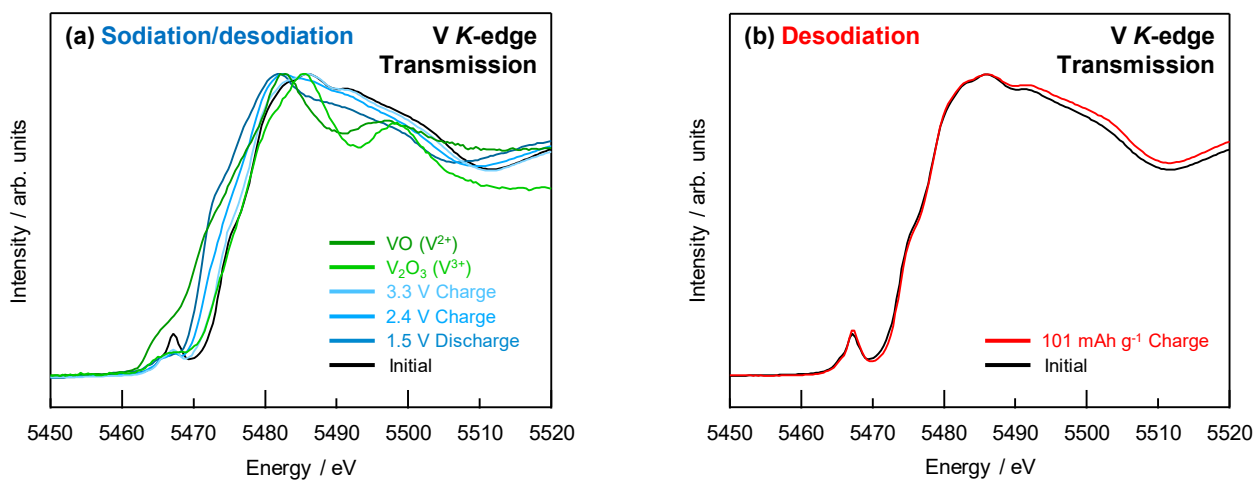

**Fig. S8** V K-edge XANES spectra of NaV(SO<sub>4</sub>)<sub>2</sub> at the different charge–discharge states during the first cycle for (a) the sodiation/desodiation process and (b) desodiation process from the initial composition in cells constructed using 1 M NaPF<sub>6</sub> EC:DEC (1:1 by volume) electrolyte. Transmission mode was used for the measurements with hard X-rays.

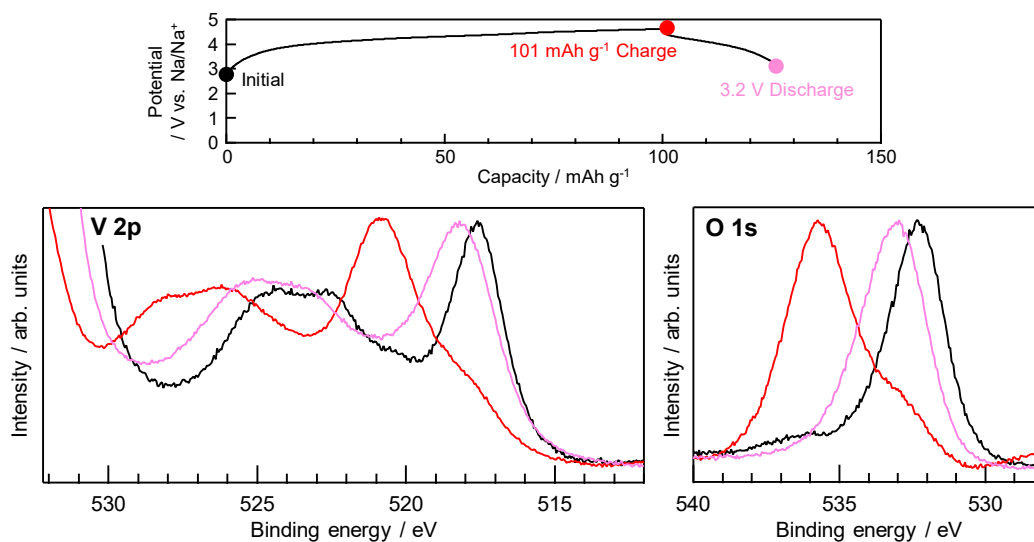

**Fig. S9** *Ex-situ* XPS spectra of  $\text{NaV}(\text{SO}_4)_2$  at different charge–discharge states during the first cycle of cells constructed using 1 M  $\text{NaClO}_4$  in EC:DMC (1:1 by volume) as the electrolyte. The measured samples were obtained from the disassembled coin cells after they were washed with DMC. To eliminate the mismatch resulting from sample charging, the binding energy values were corrected on the basis of the binding energy of the adventitious carbon compared with the standard binding energy of carbon.

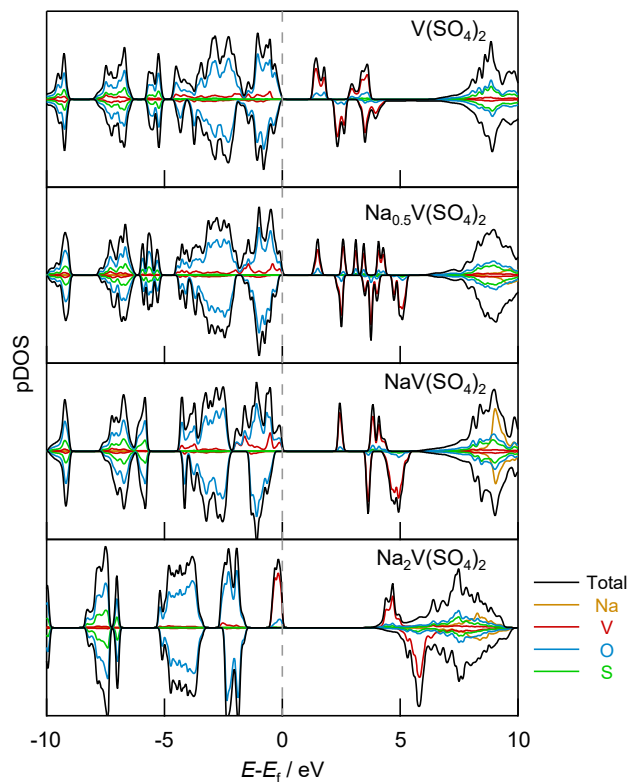

**Fig. S10** Calculated partial density of states (pDOS) for  $Na_xV(SO_4)_2$  ( $x = 0, 0.5, 1, 2$ ), as obtained using DFT calculations. The dashed line is the Fermi energy level.

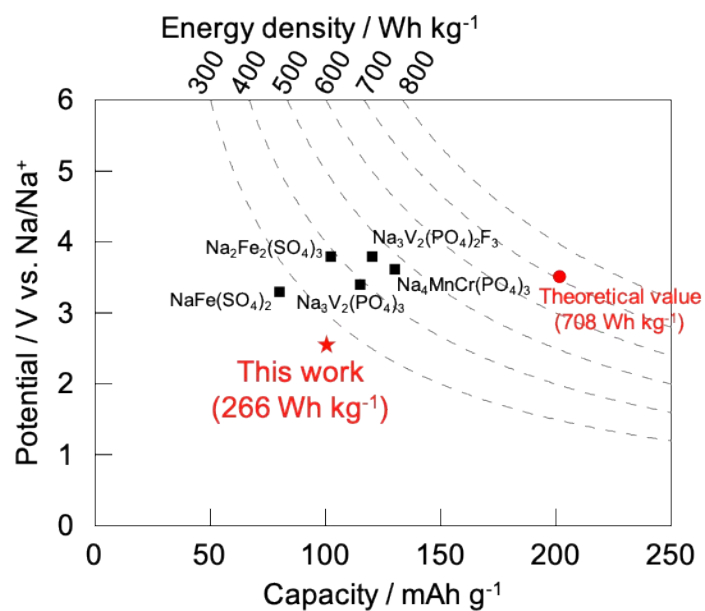

**Fig. S11** Capacity and potential plots of competitive polyanionic cathode materials for Na-ion batteries.

Theoretical value of NaV(SO<sub>4</sub>)<sub>2</sub> is also plotted.<sup>2-6</sup>

**Table S1** Crystallographic parameters of as-synthesized  $\text{NaV}(\text{SO}_4)_2$ , as obtained by Rietveld refinement using the RIETAN-FP program.<sup>7</sup>

|                                          |                                      |
|------------------------------------------|--------------------------------------|
| Chemical formula                         | $\text{NaV}(\text{SO}_4)_2$          |
| Formula weight                           | 266.056                              |
| Crystal system, space group              | Monoclinic, $C2/m$                   |
| Temperature                              | ~298 K (ambient)                     |
| $a, b, c / \text{\AA}$                   | 8.0289(16), 5.16063(10), 7.1370 (17) |
| $\alpha, \beta, \gamma / \text{degrees}$ | 90, 91.870(12), 90                   |
| $V / \text{\AA}^3$                       | 295.56(11)                           |
| $Z$                                      | 2                                    |
| Calculated density / $\text{g cm}^{-3}$  | 2.989                                |
| $R_{\text{wp}}$                          | 6.16%                                |
| $R_{\text{p}}$                           | 4.63%                                |
| $R_{\text{e}}$                           | 4.76%                                |
| $R_{\text{B}}$                           | 2.80%                                |
| $R_{\text{F}}$                           | 1.58%                                |
| $S$                                      | 1.29                                 |
| Goodness of fit                          | 1.68                                 |
| Radiation                                | Cu $K\alpha$                         |

| Atom | Wyckoff site | $x$        | $y$       | $z$        | occ. | $B_{\text{iso}} / \text{\AA}^2$ |
|------|--------------|------------|-----------|------------|------|---------------------------------|
| Na1  | 2c           | 0          | 0         | 1/2        | 1    | 2.03(6)                         |
| V1   | 2a           | 0          | 0         | 0          | 1    | 0.41(2)                         |
| S1   | 4i           | 0.3619(15) | 0         | 0.2211(15) | 1    | 1.06(3)                         |
| O1   | 4i           | 0.2351(3)  | 0         | 0.0605(3)  | 1    | 1.28(3)                         |
| O2   | 4i           | 0.2884(3)  | 0         | 0.4066(3)  | 1    | 1.28(3)                         |
| O3   | 8j           | 0.4686(18) | 0.2343(3) | 0.2005(19) | 1    | 1.28(3)                         |

**Table S2** Magnetic moment and Bader charge on V and O sites in  $\text{Na}_x\text{V}(\text{SO}_4)_2$  ( $x = 0, 0.5, 1, 2$ ) structures.

|                                          | Magnetic moment / $\mu_B$ |        | Bader charge / e |        |
|------------------------------------------|---------------------------|--------|------------------|--------|
|                                          | V                         | O      | V                | O      |
| $\text{Na}_2\text{V}(\text{SO}_4)_2$     | 2.752                     | 0      | 1.574            | -1.373 |
| $\text{NaV}(\text{SO}_4)_2$              | 1.912                     | -0.004 | 2.024            | -1.328 |
| $\text{Na}_{0.5}\text{V}(\text{SO}_4)_2$ | 1.511                     | -0.013 | 2.139            | -1.284 |
| $\text{V}(\text{SO}_4)_2$                | 1.093                     | -0.018 | 2.244            | -1.234 |

## References

- 1 K. Momma and F. Izumi, *J. Appl. Crystallogr.*, 2011, **44**, 1272–1276.
- 2 K. Chihara, A. Kitajou, I. D. Gocheva, S. Okada and J. I. Yamaki, *J. Power Sources*, 2013, **227**, 80–85.
- 3 P. Barpanda, G. Oyama, S. I. Nishimura, S. C. Chung and A. Yamada, *Nat. Commun.*, 2014, **5**, 1–8.
- 4 P. Singh, K. Shiva, H. Celio and J. B. Goodenough, *Energy Environ. Sci.*, 2015, **8**, 3000–3005.
- 5 J. Wang, Y. Wang, D. Seo, T. Shi, S. Chen, Y. Tian, H. Kim and G. Ceder, *Adv. Energy Mater.*, 2020, **10**, 1903968.
- 6 Y. Uebou, T. Kiyabu, S. Okada and J. Yamaki, *Reports Inst. Adv. Mater. Study, Kyushu Univ.*, 2002, **16**, 1–5.
- 7 F. Izumi and K. Momma, *Solid State Phenom.*, 2007, **130**, 15–20.
